# Supplementary material for: Comparison of Malaria Simulations Driven by Meteorological Observations and Reanalysis Products in Senegal
Source: PubMed Central journal article supplement (PMC5664620; doi:10.3390/ijerph14101119), 2017-09-25
Supplement: ijerph-14-01119-s001.pdf [file ijerph-14-01119-s001.pdf]

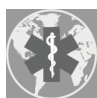

## Supplementary Material

# Comparison of Malaria Simulations Driven by Meteorological Observations and Reanalysis Products in Senegal

Ibrahima Diouf, Belen Rodriguez-Fonseca, Abdoulaye Deme, Cyril Caminade, Andrew P. Morse, Moustapha Cisse, Ibrahima Sy, Ibrahima Dia, Volker Ermert, Jacques-André Ndione and Amadou Thierno Gaye

**Table S1.** Review of the LMM set of parameter settings.

| Sym                  | Parameter                                                                    | Unit              | Val <sub>2010</sub> | R <sub>lit</sub>  |               |
|----------------------|------------------------------------------------------------------------------|-------------------|---------------------|-------------------|---------------|
| $D_{gH}$             | humid degree days of the gonotrophic cycle                                   | degree days       | 37.1                | 37.1              | 37.1          |
| $D_{gL}$             | dry degree days of the gonotrophic cycle                                     | degree days       | 65.4                | 65.4              | 65.4          |
| $T_{gH}$             | humid gonotrophic temperature threshold                                      | °C                | 7.7                 | 7.7               | 7.7           |
| $T_{gL}$             | dry gonotrophic temperature threshold                                        | °C                | 4.5                 | 4.5               | 4.5           |
| $R_{-}$              | 10-day accumulated precipitation threshold                                   | mm                | 10                  | 10                | NA            |
| $R_{\bullet}$        | rainfall laying multiplier                                                   | -                 | 1.0                 | NU                | NA            |
| $\#E_p$              | number of produced eggs per female mosquito                                  | eggs              | NU                  | CA                | 5-290         |
| $\#E_o$              | number of oviposited eggs per female mosquito                                | eggs              | NU                  | <b>Eq. 2</b>      | NA            |
| $U_1$                | lower threshold of unsuitable rainfall conditions (fuzzy distribution model) | mm                | NU                  | <b>0</b>          | 0             |
| $S$                  | most suitable rainfall condition (fuzzy distribution model)                  | mm                | NU                  | CA                | NA            |
| $U_2$                | upper threshold of unsuitable rainfall conditions (fuzzy distribution model) | mm                | NU                  | CA                | NA            |
| $CAP$                | cap on the number of fertile mosquitoes                                      | -                 | 10,000              | CA                | NA            |
| $MMA$                | mosquito mature age                                                          | days              | 15                  | <b>12</b>         | 11.2–30       |
| $\eta_{d-R}$         | rainfall independent immature daily mosquito survival probability            | %                 | NU                  | 82.5              | 52.7–99.9     |
| $\eta_d$             | daily immature mosquito survival probability                                 | %                 | Eq. 3               | <b>Eq. 4</b>      | 52.7–89.9     |
| $p_d$                | daily mosquito survival probability                                          | %                 | Martens I           | <b>Martens II</b> | Add. file 4   |
| $p_{d\downarrow}$    | dry season mosquito survival probability shift                               | %                 | NU                  | CA                | Add. file 4   |
| $D_s$                | degree-days of the sporogonic cycle                                          | degree days       | 111.0               | 111.0             | 111.0–204.4   |
| $T_s$                | sporogonic temperature threshold                                             | °C                | 18                  | <b>16</b>         | 14.2–19.0     |
| $a$                  | human blood index                                                            | %                 | 50                  | <b>80</b>         | 0–100         |
| $b$                  | mosquito-to-human transmission efficiency                                    | %                 | 50                  | <b>30</b>         | 1–50          |
| $c_{a\rightarrow c}$ | adult-child conversion rate                                                  | -                 | NU                  | <b>0.5</b>        | 0.28–0.5      |
| $HIA$                | human infectious age                                                         | days              | 14                  | <b>20</b>         | 12–30         |
| $r$                  | daily human recovery rate                                                    | day <sup>-1</sup> | 0.0284              | <b>0.0050</b>     | 0.0015–0.0385 |
| $GF$                 | fraction of gametocyte carriers                                              | %                 | NU                  | <b>50</b>         | 10–70         |
| $c$                  | human-to-mosquito transmission efficiency                                    | %                 | 50                  | <b>20</b>         | 0–37.9        |
| $tr_{im}$            | trickle of the number of added infectious mosquitoes                         | -                 | 1.01                | 1.01              | NA            |

LMM model parameters and mathematical formulations with regard the new settings in the LMM2010. Columns: Sym: symbol of the model parameter; Parameter: name of the parameter; Val2010: parameter value or mathematical formulation of the LMM2010; ref2010: LMM2010 reference;

Rlit: literature values. Abbreviations: NU: not used; NA: not available; CA: will be calibrated in the second part of the study [45]. Martens II refers to Martens et al (1997).

## **References**

Martens, W.J.M. Health impacts of climate change and ozone depletion: An eco-epidemiological modelling approach. Ph.D. Thesis, Maastricht University, Maastricht, The Netherlands, 1997.
